# Supplementary material for: BNT162b2 vaccine-induced humoral and cellular responses against SARS-CoV-2 variants in systemic lupus erythematosus
Source: HighWire-hosted journal article supplement (doi:10.1136/annrheumdis-2021-221097), 2021-10-04
Supplement: annrheumdis-2021-221097supp004_data_supplement.pdf [file annrheumdis-2021-221097supp004_data_supplement.pdf]

**SUPPLEMENTARY MATERIAL****Table S1: Local and systemic adverse events reported at days 14, 28 and 45 after first BNT162b2 dose in 126 SLE patients**

| <b>Adverse event</b>   | <b>Day 14</b> | <b>Day 28</b> | <b>Day 42</b> |
|------------------------|---------------|---------------|---------------|
| Any adverse event      | 97 (77.0%)    | 46 (36.5%)    | 70 (56.5%)    |
| Pain at injection site | 85 (67.5%)    | 17 (13.5%)    | 49 (39.5%)    |
| Fatigue                | 50 (39.7%)    | 26 (20.6%)    | 44 (35.5%)    |
| Headache               | 32 (25.4%)    | 22 (17.5%)    | 23 (18.5%)    |
| Fever                  | 10 (7.9%)     | 3 (2.4%)      | 7 (5.6%)      |
| Local redness          | 5 (4.0%)      | 1 (0.8%)      | 2 (1.6%)      |
| Vomiting               | 8 (6.3%)      | 6 (4.8%)      | 6 (4.8%)      |
| Diarrhea               | 13 (10.3%)    | 11 (8.7%)     | 9 (7.3%)      |
| Muscle pain            | 19 (15.1%)    | 11 (8.7%)     | 17 (13.7%)    |
| Joint pain             | 22 (17.5%)    | 11 (8.7%)     | 17 (13.7%)    |
| Insomnia               | 17 (13.5%)    | 11 (8.7%)     | 10 (8.1%)     |

Variables are presented as n (%)

**Table S2. Baseline predictors of day 42 anti-SARS-CoV-2 RBD IgG titers according to linear regression model.** SLE activity is measured with SLEDAI.

|                                     | $\beta$ | 95% CI      | p-value |
|-------------------------------------|---------|-------------|---------|
| Age, years                          | -0.47   | -1.8, 0.88  | 0.5     |
| Male sex                            | -55     | -121, 10    | 0.10    |
| SLEDAI 2K >4 on day 1               | -19     | -81, 42     | 0.5     |
| C3, g/L                             | 43      | -70, 156    | 0.4     |
| dsDNA antibodies, IU/mL             | 0.04    | -0.05, 0.14 | 0.4     |
| IFN                                 | -2.9    | -6.9, 1.1   | 0.2     |
| IgA, g/L                            | 0.62    | -14, 15     | >0.9    |
| IgG, g/L                            | 2.0     | 0.35, 3.6   | 0.018   |
| IgM, g/L                            | 12      | -0.66, 25   | 0.063   |
| Lymphocytes, day 1 (G/L)            | 9.0     | -29, 47     | 0.6     |
| Corticosteroids low                 | -18     | -64, 28     | 0.4     |
| Corticosteroids high                | -51     | -130, 28    | 0.2     |
| Hydroxychloroquine                  | -22     | -80, 36     | 0.5     |
| Azathioprine                        | -128    | -256, -0.22 | 0.050   |
| Belimumab                           | -15     | -89, 58     | 0.7     |
| Mycophenolate mofetil               | -77     | -154        | 0.008   |
| Other immunosuppressor <sup>#</sup> | 63      | -32, 157    | 0.2     |
| Methotrexate                        | -120    | -241        | <0.001  |

$\beta$ : see Material and methods; CI = Confidence Interval; dsDNA: double stranded DNA; IFN: Interferon; RBD: Receptor Binding Domain; SLEDAI: SLE Disease Activity Index; <sup>#</sup>Other immunosuppressors include: ciclosporine (n=1), revlimid (n=1), tacrolimus (n=1), thalidomide (n=1) and tofacitinib (n=1). Beta, CI and P-values were calculated using multivariate regression analysis.

**Table S3. Baseline predictors of serum neutralizing activity at day 42 according to linear regression model**

|                                     | $\beta$ | 95% CI      | p-value |
|-------------------------------------|---------|-------------|---------|
| Age, years                          | -0.01   | -0.02, 0.01 | 0.6     |
| Male sex                            | -0.76   | -1.7, 0.15  | 0.10    |
| At least one BILAG score $\geq$ B   | -1.2    | -2.1, -0.27 | 0.011   |
| C3, g/L                             | 0.81    | -0.71, 2.3  | 0.3     |
| dsDNA antibodies, IU/mL             | 0.00    | 0.00, 0.00  | 0.7     |
| Detectable IFN alpha                | -0.06   | -0.11, 0.00 | 0.046   |
| Total serum IgA, g/L                | -0.02   | -0.22, 0.17 | 0.8     |
| Total serum IgG, g/L                | 0.01    | -0.01, 0.04 | 0.3     |
| Total serum IgM, g/L                | 0.05    | -0.12, 0.23 | 0.5     |
| Corticosteroids $\leq$ 10mg/day     | -0.04   | -0.67, 0.59 | >0.9    |
| Corticosteroids >10mg/day           | -0.07   | -1.1, 1.0   | >0.9    |
| Hydroxychloroquine                  | -0.01   | -0.83, 0.80 | >0.9    |
| Azathioprine                        | -1.4    | -3.2, 0.30  | 0.10    |
| Belimumab                           | 0.26    | -0.75, 1.3  | 0.6     |
| Mycophenolate mofetil               | -1.1    | -1.9, -0.34 | 0.005   |
| Methotrexate                        | -1.9    | -2.7, -1.0  | <0.001  |
| Other immunosuppressor <sup>#</sup> | 0.26    | -1.0, 1.6   | 0.7     |

$\beta$ : see Material and methods; BILAG: British Isles Lupus Assessment Group; CI = Confidence Interval; dsDNA: double stranded DNA; IFN: Interferon; <sup>#</sup>Other immunosuppressors include: ciclosporine (n=1), revlimid (n=1), tacrolimus (n=1), thalidomide (n=1) and tofacitinib (n=1). Beta, CI and P-values were calculated using multivariate regression analysis.

**Table S4: Baseline B cell predictors of serum neutralizing activity at day 42 according to linear regression model**

|                                          | $\beta^*$ | 95% CI      | p-value |
|------------------------------------------|-----------|-------------|---------|
| Corticosteroids $\leq 10$ mg/day         | -0.18     | -0.79, 0.43 | 0.6     |
| Corticosteroids $> 10$ mg/day            | -1.0      | -2.1, 0.19  | 0.10    |
| Hydroxychloroquine                       | 0.05      | -0.90, 1.0  | $> 0.9$ |
| Azathioprine                             | -0.85     | -2.8, 1.1   | 0.4     |
| Belimumab                                | 0.30      | -1.1, 1.7   | 0.7     |
| Mycophenolate mofetil                    | -1.6      | -2.6, -0.69 | 0.001   |
| Methotrexate                             | -1.4      | -2.4, -0.39 | 0.007   |
| Other immunosuppressor <sup>#</sup>      | 1.3       | -1.1, 3.7   | 0.3     |
| Marginal zone B lymphocytes, Day 1 (%)   | -0.01     | -0.04, 0.02 | 0.5     |
| Autoreactive B lymphocytes, Day 1 (%)    | -0.01     | -0.04, 0.03 | 0.7     |
| Naïve B lymphocytes, Day 1 (%)           | 0.04      | 0.01, 0.07  | 0.006   |
| Double negative B lymphocytes, Day 1 (%) | -0.01     | -0.08, 0.07 | 0.9     |
| Memory B lymphocytes, Day 1 (%)          | -0.02     | -0.04, 0.00 | 0.10    |

$\beta$ : see Material and methods; CI = Confidence Interval; \*Log (D614G); <sup>#</sup>Other immunosuppressors include: ciclosporine (n=1), revlimid (n=1), tacrolimus (n=1), thalidomide (n=1) and tofacitinib (n=1). Autoreactive B cells (CD21lowCD38low); Double Negative B cells (CD27-IgD-); Marginal Zone B cells (CD27+IgD+); Memory B cells (CD27+IgD-); Naïve B cells (CD27-IgD+). B cell subsets frequencies are measured in total B cells. Beta, CI and P-values were calculated using multivariate regression analysis.

**Table S5: Demographics and clinico-biological features of SLE patients included in SARS-CoV-2 T-cell analysis**

|                                                   | <b>N = 38</b>          |
|---------------------------------------------------|------------------------|
| Female sex                                        | 36 (94.7%)             |
| Age, years                                        | 44.7 (30.6, 55.1)      |
| Time from SLE onset, months                       | 11.8 (7.2, 21.2)       |
| Time from last flare, months                      | 1.2 (0.3, 2.8)         |
| SLEDAI 2K                                         | 2.0 (0.0, 4.0)         |
| SLEDAI 2K > 4                                     | 8 (21.1%)              |
| At least one BILAG score $\geq$ B                 | 3 (7.9%)               |
| Hydroxychloroquine blood concentration, $\mu$ g/L | 905.0 (773.0, 1,123.0) |
| Low complement C3 (< 0.7g/L)                      | 8 (21.1%)              |
| Increased dsDNA binding (> 30 IU/mL)              | 24 (63.2%)             |
| Detectable interferon alpha (> 2 IU/mL)           | 3 (8.6%)               |
| Hydroxychloroquine                                | 34 (89.5%)             |
| No corticosteroids                                | 13 (34.2%)             |
| Corticosteroids $\leq$ 10mg/day                   | 18 (47.7%)             |
| Corticosteroids >10mg/day                         | 7 (18.4%)              |
| Belimumab                                         | 9 (23.7%)              |
| Mycophenolate mofetil                             | 11(28.9%)              |
| Azathioprine                                      | 2 (5.3%)               |
| Methotrexate                                      | 12 (31.6%)             |

Qualitative variables are presented as n (%); Quantitative variables are presented as median (Interquartile range); dsDNA: double stranded DNA; SLEDAI: SLE Disease activity score; BILAG: British Isles Lupus Assessment Group

**Figure S1: Analysis of peripheral B cell subsets phenotyping**

Representative flow cytometry gating strategy for CD27+IgD- memory B cells (A), CD27+IgD+ Marginal Zone B cells (B), CD27-IgD- Double Negative B cells (C), CD27-IgD+ Naïve B cells (D), CD21lowCD38low B cells (E)

**Figure S2: Local and systemic reactions reported throughout the vaccination schedule.****Figure S3: Baseline B cells influence SARS-CoV-2 antibody response**

- A. Comparison of serum anti-RBD IgG levels measured by photonic ring immunoassay (n=47) with B cell counts (number/ $\mu$ l). Pearson coefficient (r) and p value (p) are indicated.
- B. Comparison of serum anti-RBD IgG levels measured by photonic ring immunoassay (n=57) with naïve B cell frequency (%). Pearson coefficient (r) and p value (p) are indicated.
- C. Comparison of serum neutralizing activities measured as ID50 (n=63) with B cell counts (number/ $\mu$ l). Pearson coefficient (r) and p value (p) are indicated.
